# Supplementary material for: A portable bilayer microneedle patch for rapid and patient-friendly administration of rabies immunoglobulin and enhanced wound healing
Source: Royal Society of Chemistry journal article supplement (doi:10.1039/d5tb01351h), 2025-12-22
Supplement: d5tb01351h1.pdf [file d5tb01351h1.pdf]

*Supporting information*

**Portable Bilayer Microneedle Patch for Rapid and Patient-Friendly Administration of Rabies Immunoglobulin and Enhanced Wound Healing**

*Yaojun Lu*<sup>1, 4, 6, #</sup>, *Hanhan Xie*<sup>7, #</sup>, *Minyi Huang*<sup>2, 5</sup>, *Yuru Liu*<sup>2, 5</sup>, *Xingxing Li*<sup>3</sup>, *Xiaofeng Guo*<sup>2, 5</sup>, *Jundong Shao*<sup>3, \*</sup>, *Yongwen Luo*<sup>2, 5, \*</sup>, *Lin Wang*<sup>1, 4, 6, \*</sup>

1. National Engineering Research Center for Tissue Restoration and Reconstruction, South China University of Technology, Guangzhou 510006, China. Email: [wanglin3@scut.edu.cn](mailto:wanglin3@scut.edu.cn)

2. College of Veterinary Medicine, South China Agricultural University, Guangzhou, 510642, China. Email: [ywluo@scau.edu.cn](mailto:ywluo@scau.edu.cn)

3. Guangzhou Institute of Cancer Research, the Affiliated Cancer Hospital, School of Biomedical Engineering, Guangzhou Medical University, Guangzhou 510182, China. Email: [shaojundong@gzhmu.edu.cn](mailto:shaojundong@gzhmu.edu.cn)

4. School of Material Science and Engineering, South China University of Technology, Guangzhou 510006, China. Email: [wanglin3@scut.edu.cn](mailto:wanglin3@scut.edu.cn)

5. Key Laboratory of Zoonosis Prevention and Control of Guangdong Province, Guangzhou, 510642, China. Email: [ywluo@scau.edu.cn](mailto:ywluo@scau.edu.cn)

6. Guangdong Provincial Key Laboratory of Biomedical Engineering, South China University of Technology, Guangzhou 510006, China. Email: [wanglin3@scut.edu.cn](mailto:wanglin3@scut.edu.cn)

7. School of Optoelectronic Engineering, Guangdong Polytechnic Normal University, Guangzhou 510665, China.

# These authors contributed equally to this work.

Corresponding author

Prof. J. D. Shao, \*E-mail: [shaojundong@gzhmu.edu.cn](mailto:shaojundong@gzhmu.edu.cn)

Prof. Y. W. Luo, \* [ywluo@scau.edu.cn](mailto:ywluo@scau.edu.cn)

Prof. L. Wang, \*E-mail: [wanglin3@scut.edu.cn](mailto:wanglin3@scut.edu.cn)

### Supplementary figures

Shape: Cone  
Height: 1200  $\mu\text{m}$   
Needle bottom side length: 600  $\mu\text{m}$   
Needle pitch: 1000  $\mu\text{m}$   
Array number: 400 needles  
Dimension of base: 25  $\text{mm}^2$   
Base thickness: 2 mm

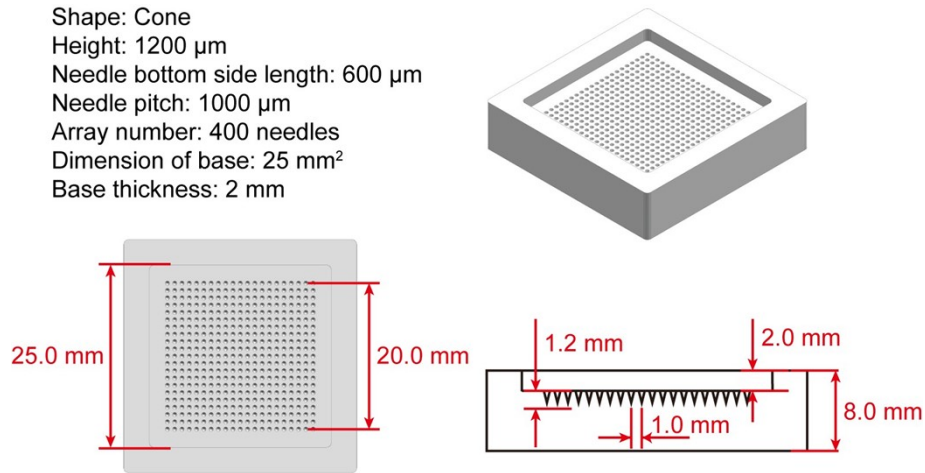

**Figure S1** The parameters of our PDMS mold used for preparing bilayer MN patch.

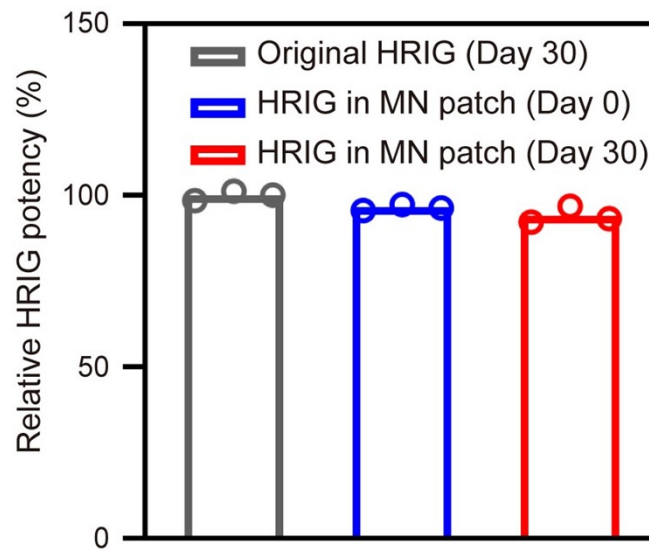

**Figure S2** The stability of HRIG in MN patches at room temperature (n=3).

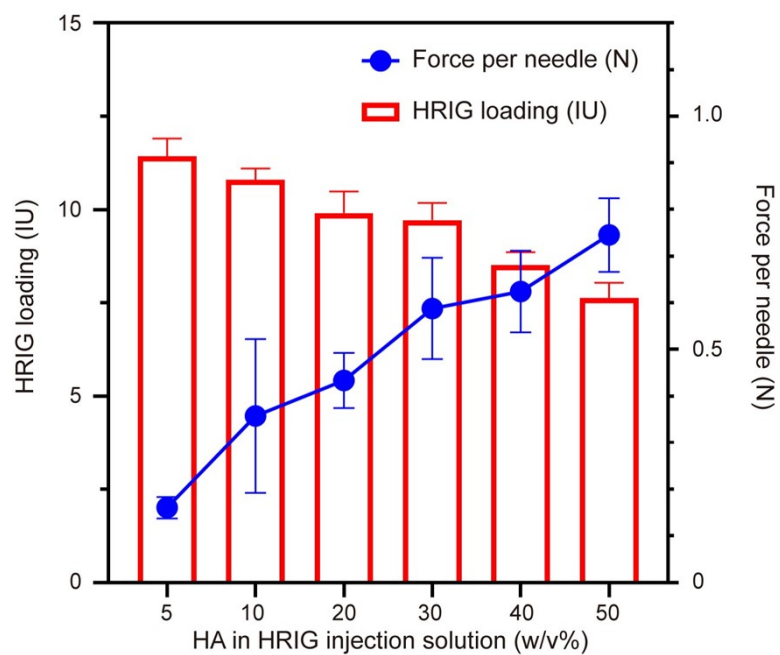

**Figure S3** The HRIG loading capacity and failure force of MN patch composed of different HA loading in HRIG solution (n=3).

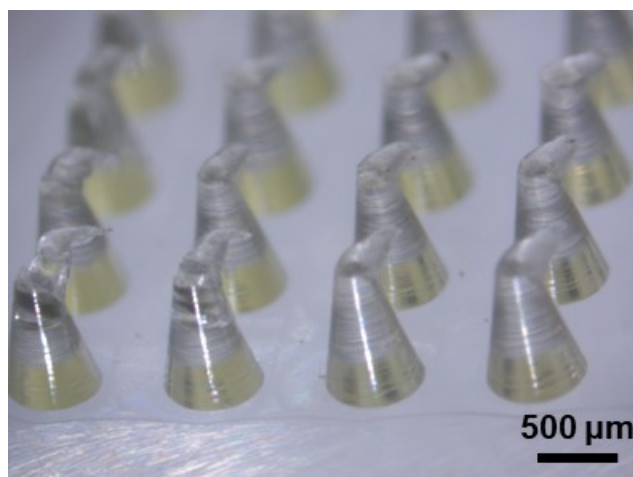

**Figure S4** The image of the needles on the MN patch after mechanical test.

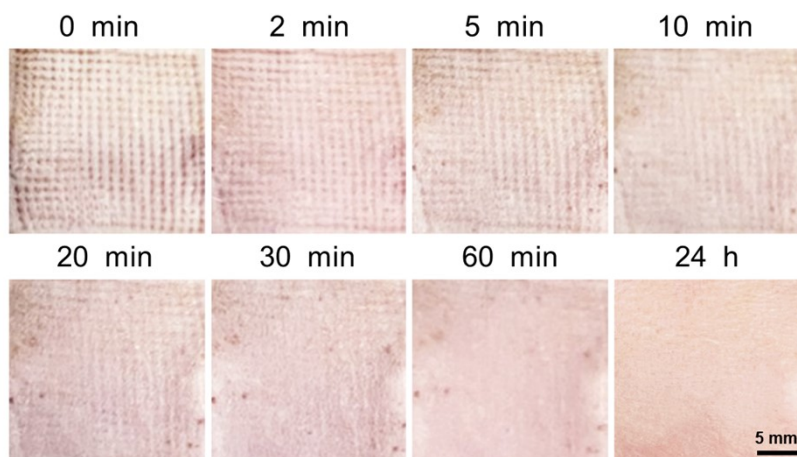

**Figure S5** Appearance of the Sprague-Dawley (SD) rat skin following MN patch application for the indicated durations.

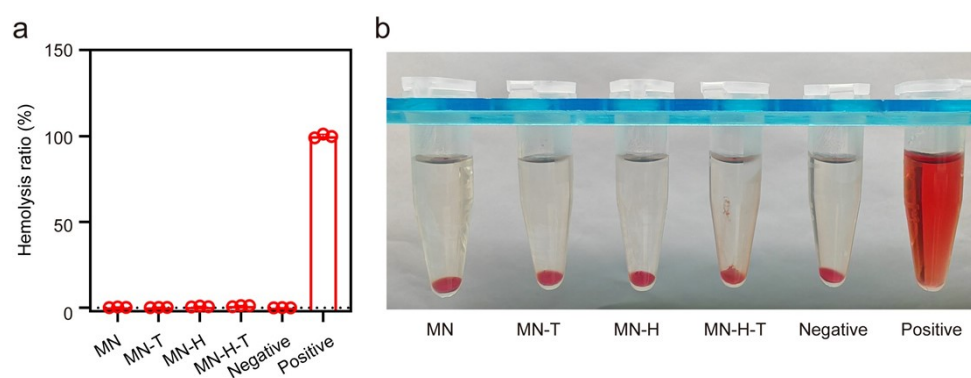

**Figure S6** The hemolysis of different MN patch. (a) The hemolysis rate of different MN patch (n=3). (b) The images of the erythrocytes incubated with different MN patch extracts.

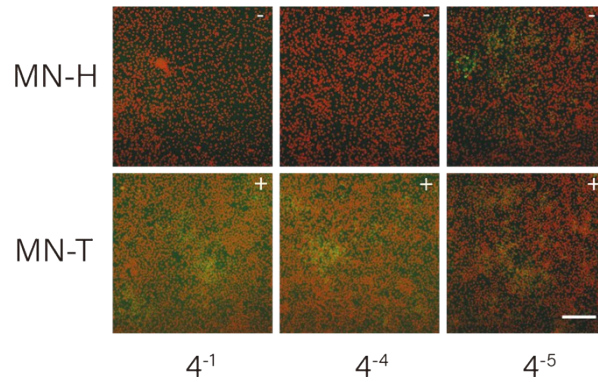

**Figure S7** The representative fluorescence images of FAVN test. The fluorescence images of *BHK-21* cells infected with RABV. The green fluorescence represented virus-infected cells, and the red fluorescence represented normal cells. The cells were strained with FITC anti-rabies monoclonal globulin (1:200) and Propidium iodide (1:500). The scale bar was 100  $\mu\text{m}$ .

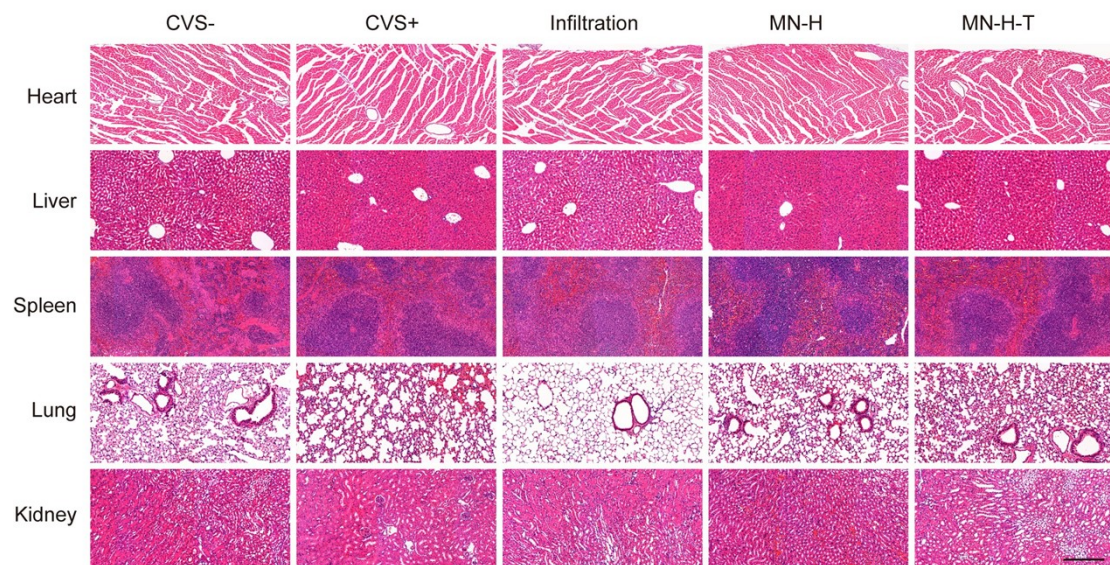

**Figure S8** The H&E staining images of organs including heart, liver, spleen, lung, and kidney of mice after different treatments on the fourteenth day. The scale bar was 200  $\mu\text{m}$ .
